# Supplementary material for: Analysis of Phytonutrients, Anti-Mutagenic and Chemopreventive Effects of Tropical Fruit Extracts
Source: MDPI journal article supplement (doi:10.3390/foods10112600), 2021-10-27

## Supplementary materials

# Analysis of Phytonutrients, Anti-mutagenic and Chemopreventive Effects of Tropical Fruit Extracts

**Piya Temviriyankul <sup>1</sup>, Suwapat Kittibunchakul <sup>1</sup>, Piyaapat Trisonthi <sup>2</sup>, Woorawee Inthachai <sup>1</sup>, Dalad Siriwan <sup>2,\*</sup> and Uthaiwan Suttisansanee <sup>1,\*</sup>**

<sup>1</sup> Food and Nutrition Academic and Research Cluster, Institute of Nutrition, Mahidol University, Salaya, Phuttamonthon, Nakhon Pathom 73170, Thailand; piya.tem@mahidol.ac.th (P.T.); suwapat.kit@mahidol.ac.th (S.K.); woorawee.int@mahidol.ac.th (W.I.)

<sup>2</sup> Institute of Food Research and Product Development, Kasetsart University, Chatuchak, Bangkok 10900, Thailand; piyapat.tr@ku.th (P.Tr).

\* Correspondence: dalad.s@ku.th (D.S.); uthaiwan.sut@mahidol.ac.th (U.S.)

† These authors contributed equally to this work.

## Supplementary Table S1:

Images of fruit samples including *Psidium guajava* 'Kimju', *Psidium guajava* 'Keenok', *Ananas comosus* 'Pattavia', *Ananas comosus* 'Phulae', *Durio zibethinus* 'Chanee', *Durio zibethinus* 'Monthong', *Carica papaya* 'Khaekdum', and *Mangifera indica* 'Namdokmai'.

| Fruits                  | Physical appearance                                                                 |                                                                                      |
|-------------------------|-------------------------------------------------------------------------------------|--------------------------------------------------------------------------------------|
| <i>Psidium guajava</i>  |    |    |
|                         | 'Kimju'                                                                             | 'Keenok'                                                                             |
| <i>Ananas comosus</i>   |  |  |
|                         | 'Pattavia'                                                                          | 'Phulae'                                                                             |
| <i>Durio zibethinus</i> |  |  |
|                         | 'Chanee'                                                                            | 'Monthong'                                                                           |

**Supplementary Table S1 (Cont.):**

Images of fruit samples including *Psidium guajava* 'Kimju', *Psidium guajava* 'Keenok', *Ananas comosus* 'Pattavia', *Ananas comosus* 'Phulae', *Durio zibethinus* 'Chanee', *Durio zibethinus* 'Monthong', *Carica papaya* 'Khaekdum', and *Mangifera indica* 'Namdokmai'.

| Fruits                                 | Physical appearance                                                                 |
|----------------------------------------|-------------------------------------------------------------------------------------|
| <i>Carica papaya</i><br>'Khaekdum'     |   |
| <i>Mangifera indica</i><br>'Namdokmai' |  |

### Supplementary Figure S1:

High-performance liquid chromatograms of phenolic standards including (A) gallic acid, (B) 4-hydroxybenzoic acid, (C) vanillic acid, (D) syringic acid, (E) hesperidin and (F) naringenin and samples including (G) *Psidium guajava* 'Kimju', (H) *Psidium guajava* 'Keenok', (I) *Ananas comosus* 'Pattavia', (J) *Ananas comosus* 'Phulae', (K) *Durio zibethinus* 'Chanee', (L) *Durio zibethinus* 'Monthong', (M) *Carica papaya* 'Khaekdum', and (N) *Mangifera indica* 'Namdokmai'. Retention times ( $R_t$ ) of phenolics in fruit extracts are indicated at a wavelength of 280 nm.

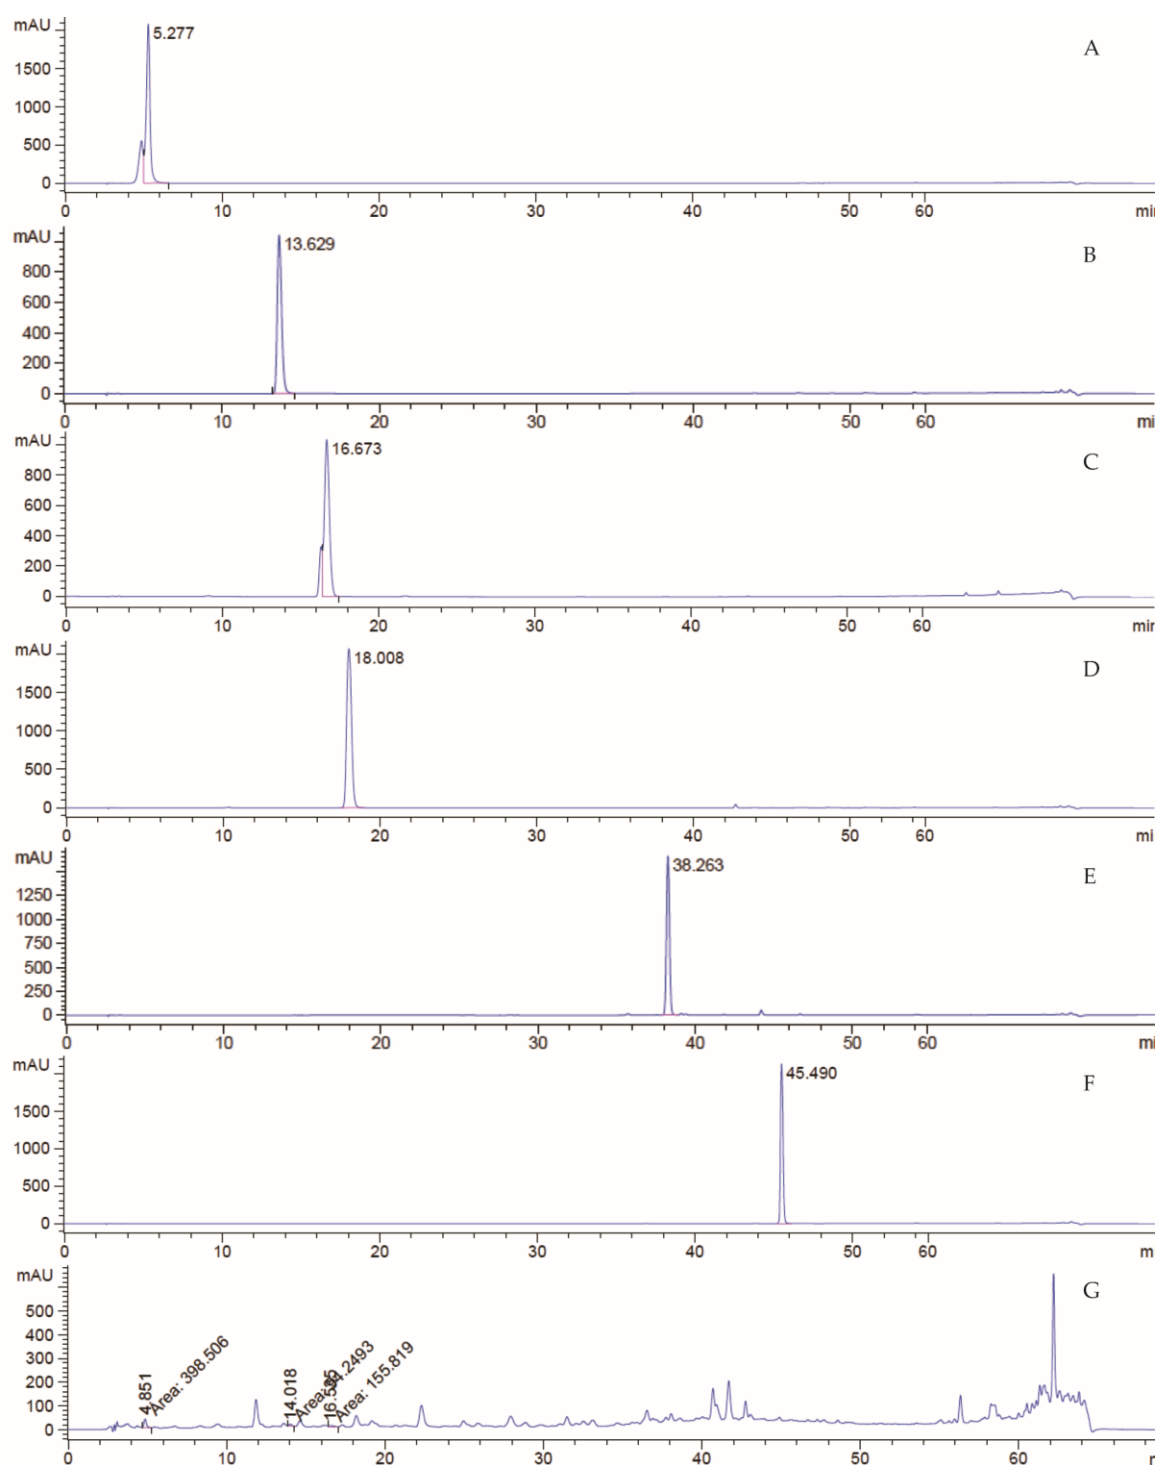

## Supplementary Figure S1 (Cont.):

High-performance liquid chromatograms of phenolic standards including (A) gallic acid, (B) 4-hydroxybenzoic acid, (C) vanillic acid, (D) syringic acid, (E) hesperidin and (F) naringenin and samples including (G) *Psidium guajava* 'Kimju', (H) *Psidium guajava* 'Keenok', (I) *Ananas comosus* 'Pattavia', (J) *Ananas comosus* 'Phulae', (K) *Durio zibethinus* 'Chanee', (L) *Durio zibethinus* 'Monthong', (M) *Carica papaya* 'Khaekdum', and (N) *Mangifera indica* 'Namdokmai'. Retention times ( $R_t$ ) of phenolics in fruit extracts are indicated at a wavelength of 280 nm.

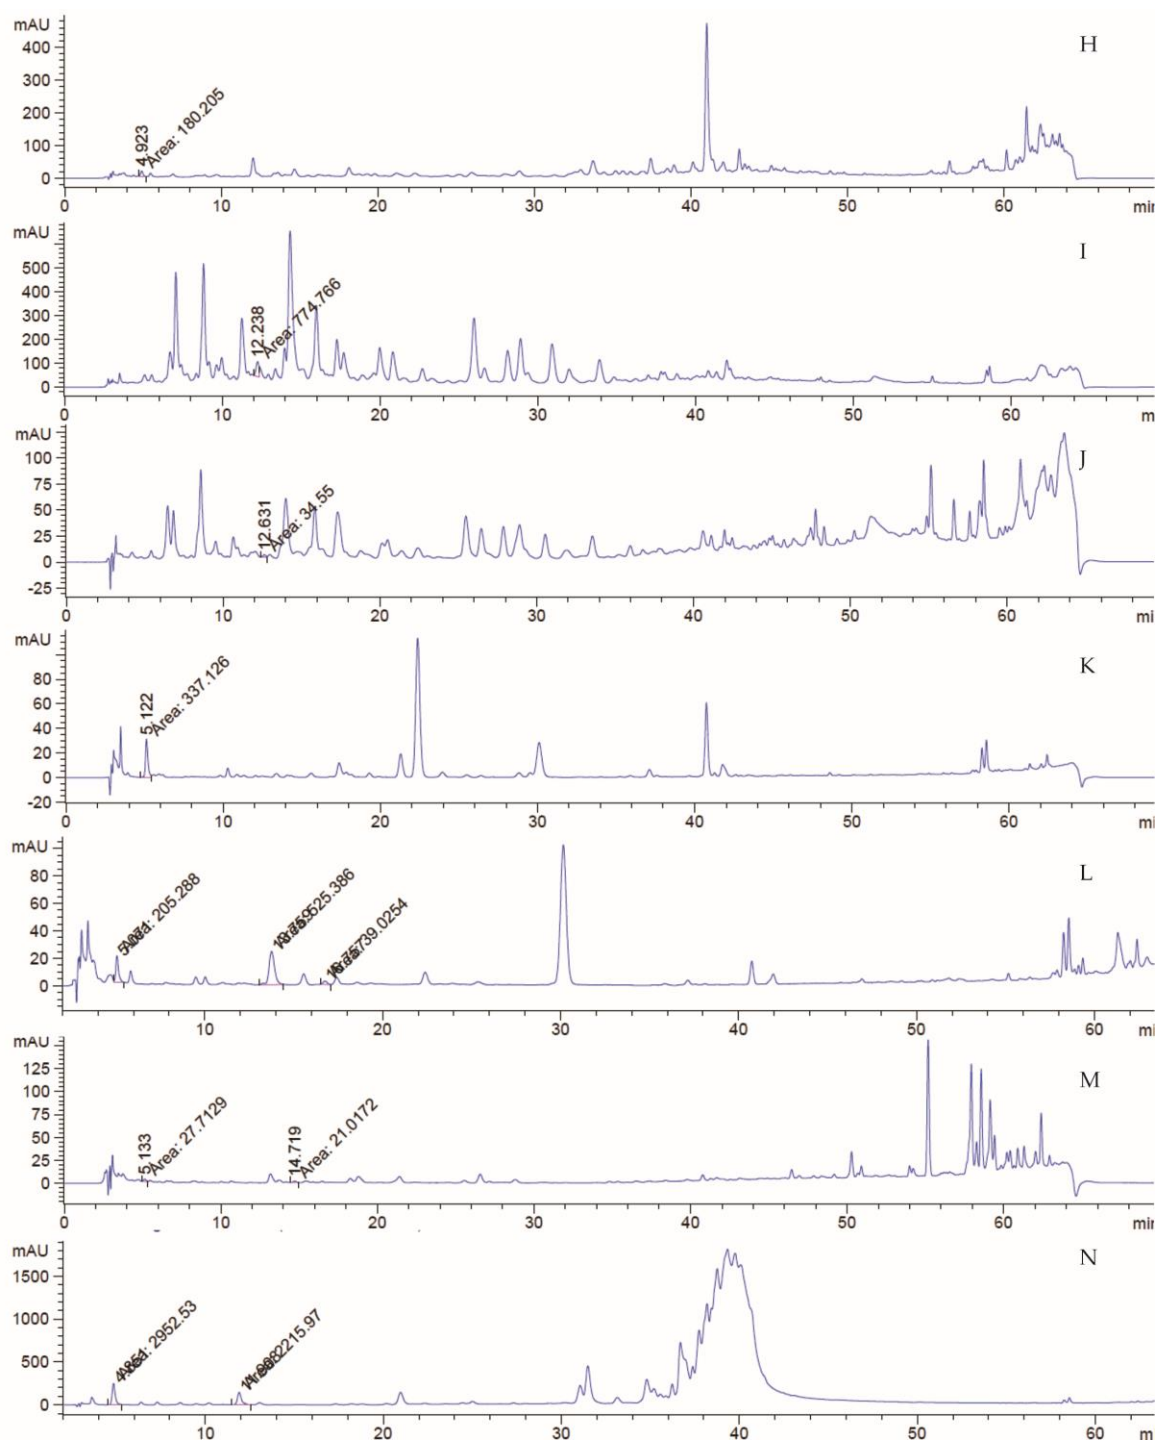

**Supplementary Figure S2:**

High-performance liquid chromatograms of phenolic standards including (A) chlorogenic acid, (B) caffeic acid, (C) *p*-coumaric acid, (D) ferulic acid, and (E) sinapic acid, and samples including (F) *Psidium guajava* 'Kimju', (G) *Psidium guajava* 'Keenok', (H) *Ananas comosus* 'Pattavia', (I) *Ananas comosus* 'Phulae', (J) *Durio zibethinus* 'Chanee', (K) *Durio zibethinus* 'Monthong', (L) *Carica papaya* 'Khaekdum', and (M) *Mangifera indica* 'Namdokmai'. Retention times ( $R_t$ ) of phenolics in fruit extracts are indicated at a wavelength of 325 nm.

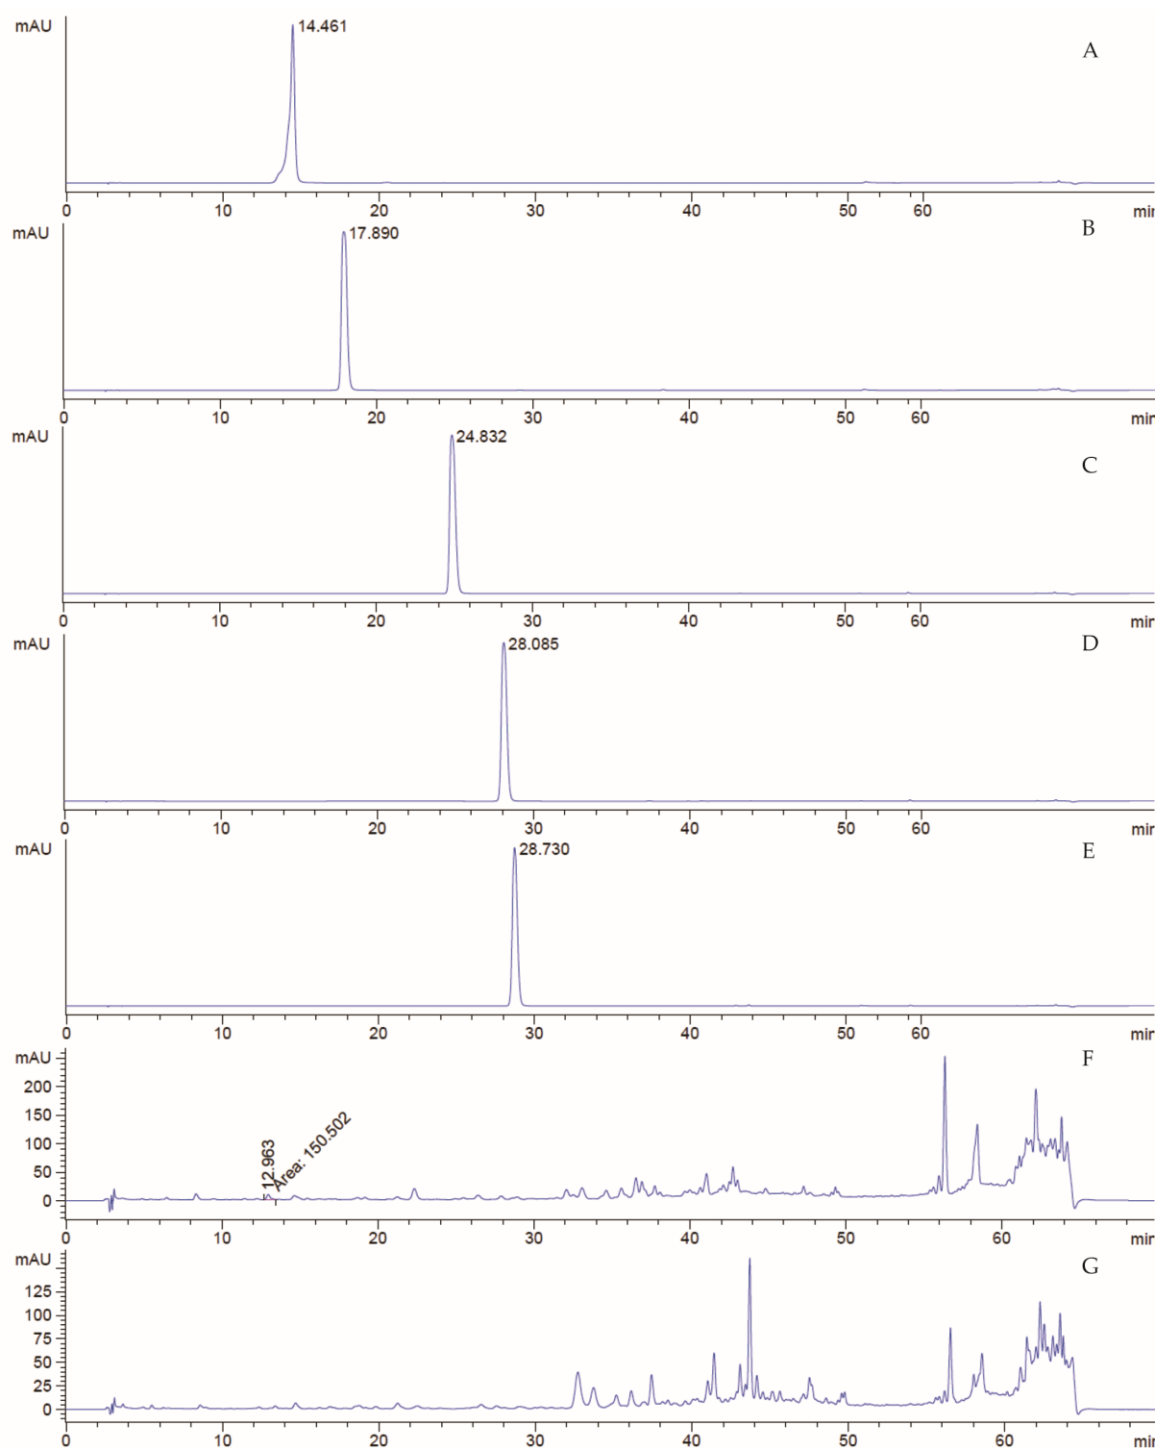



## Supplementary Figure S2 (Cont.):

High-performance liquid chromatograms of phenolic standards including (A) chlorogenic acid, (B) caffeic acid, (C) *p*-coumaric acid, (D) ferulic acid, and (E) sinapic acid, and samples including (F) *Psidium guajava* 'Kimju', (G) *Psidium guajava* 'Keenok', (H) *Ananas comosus* 'Pattavia', (I) *Ananas comosus* 'Phulae', (J) *Durio zibethinus* 'Chanee', (K) *Durio zibethinus* 'Monthong', (L) *Carica papaya* 'Khaekdum', and (M) *Mangifera indica* 'Namdokmai'. Retention times ( $R_t$ ) of phenolics in fruit extracts are indicated at a wavelength of 325 nm.

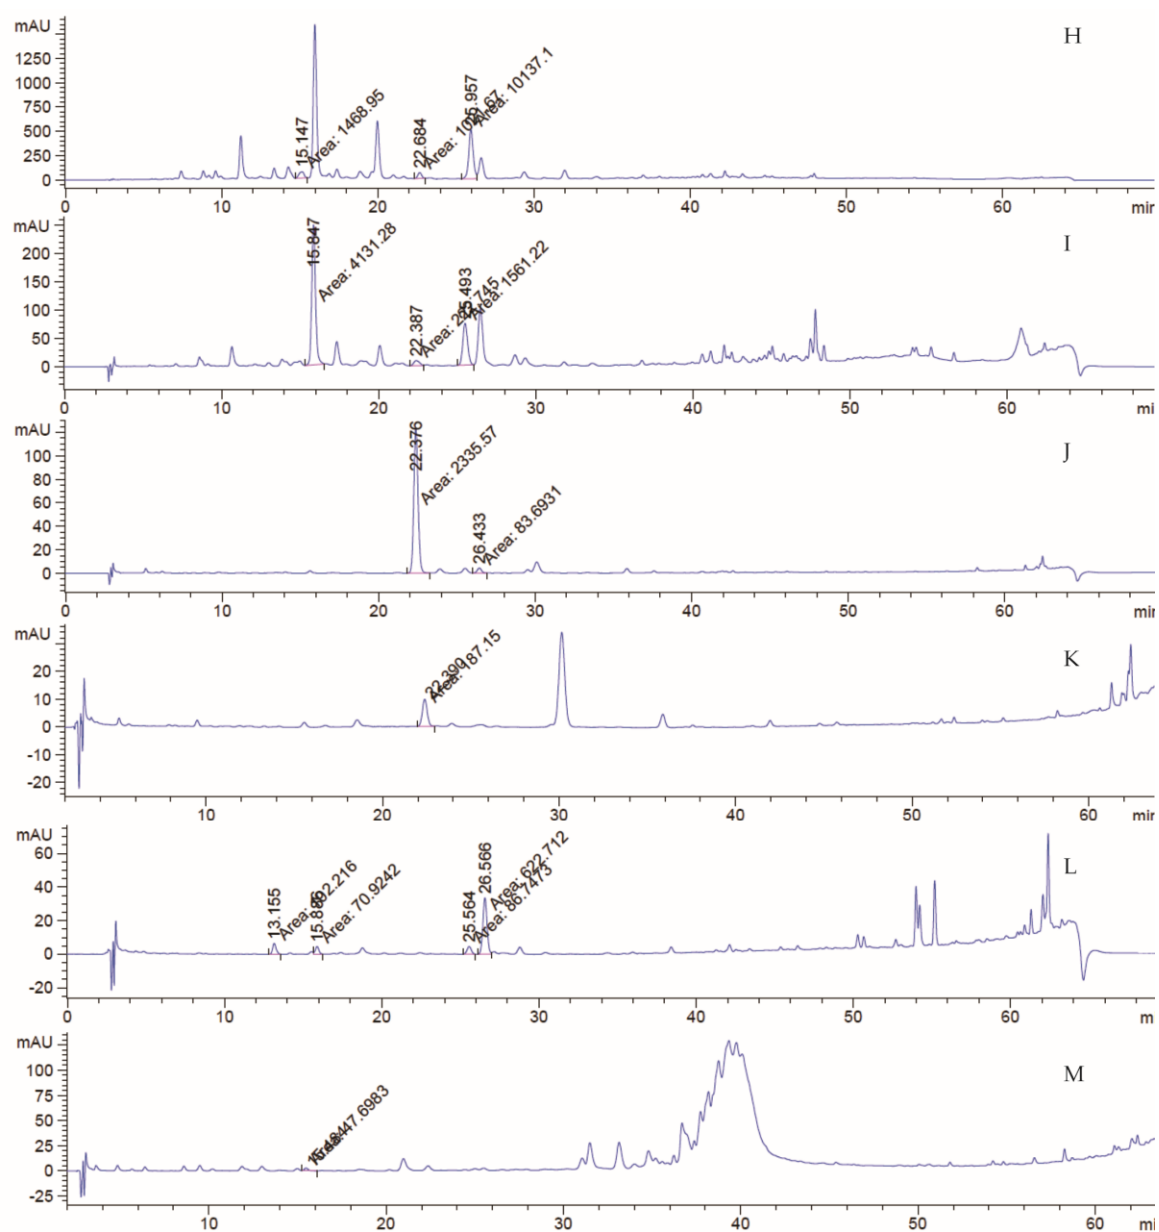

### Supplementary Figure S3:

High-performance liquid chromatograms of phenolic standards including (A) luteolin, and (B) apigenin, and samples including (C) *Psidium guajava* ‘Kimju’, (D) *Psidium guajava* ‘Keenok’, (E) *Ananas comosus* ‘Pattavia’, (F) *Ananas comosus* ‘Phulae’, (G) *Durio zibethinus* ‘Chanee’, (H) *Durio zibethinus* ‘Monthong’, (I) *Carica papaya* ‘Khaekdum’, and (J) *Mangifera indica* ‘Namdokmai’. Retention times ( $R_t$ ) of phenolics in fruit extracts are indicated at a wavelength of 338 nm.

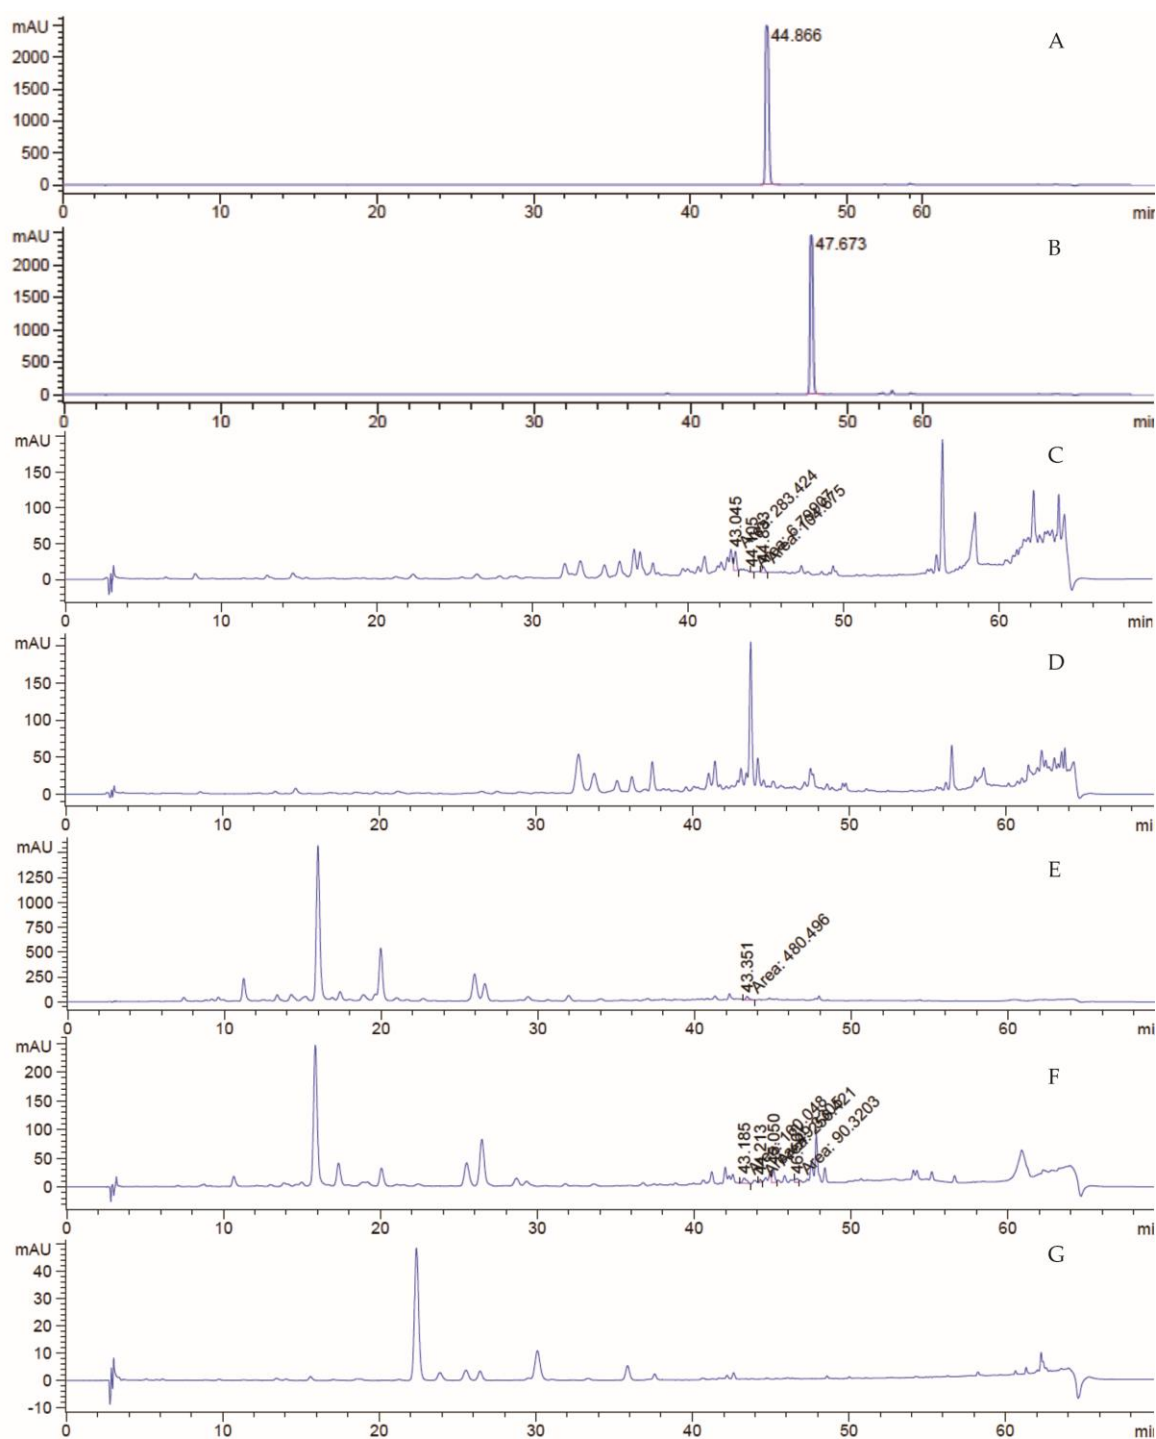



**Supplementary Figure S3 (Cont.):**

High-performance liquid chromatograms of phenolic standards including (A) luteolin, and (B) apigenin, and samples including (C) *Psidium guajava* 'Kimju', (D) *Psidium guajava* 'Keenok', (E) *Ananas comosus* 'Pattavia', (F) *Ananas comosus* 'Phulae', (G) *Durio zibethinus* 'Chanee', (H) *Durio zibethinus* 'Monthong', (I) *Carica papaya* 'Khaekdum', and (J) *Mangifera indica* 'Namdokmai'. Retention times ( $R_t$ ) of phenolics in fruit extracts are indicated at a wavelength of 338 nm.

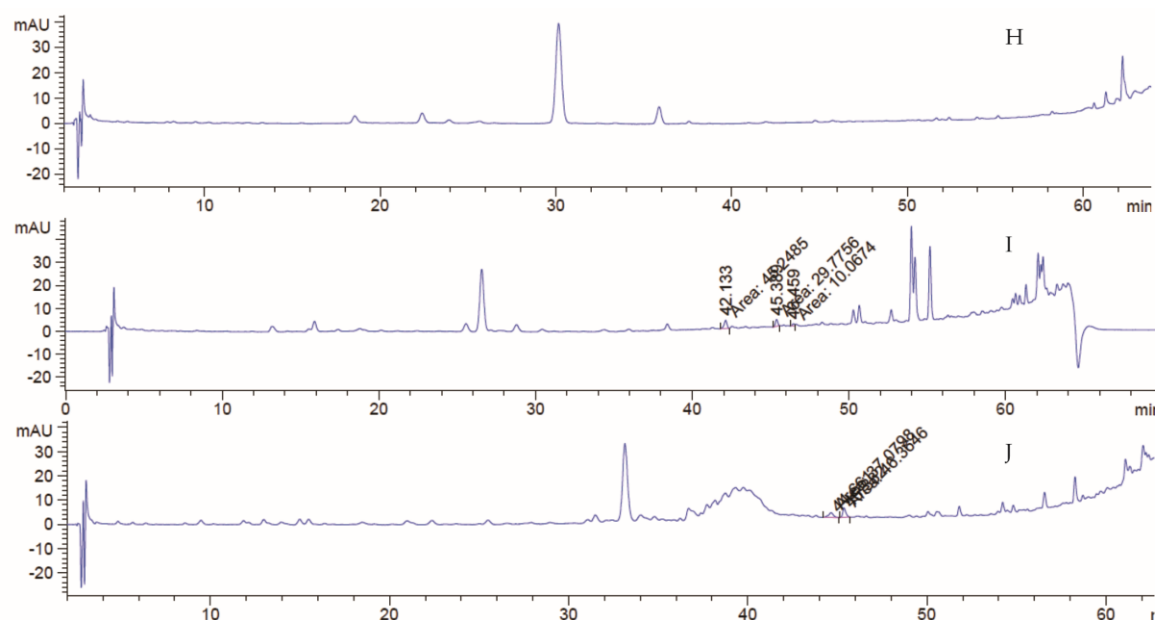

**Supplementary Figure S4:**

High-performance liquid chromatograms of standards including (A) myricetin, (B) quercetin, (C) kaempferol, and (D) isorhamnetin and samples including (E) *Psidium guajava* 'Kimju', (F) *Psidium guajava* 'Keenok', (G) *Ananas comosus* 'Pattavia', (H) *Ananas comosus* 'Phulae', (I) *Durio zibethinus* 'Chanee', (J) *Durio zibethinus* 'Monthong', (K) *Carica papaya* 'Khaekdum', and (L) *Mangifera indica* 'Namdokmai'. Retention times ( $R_t$ ) of phenolics in fruit extracts are indicated at a wavelength of 368 nm.

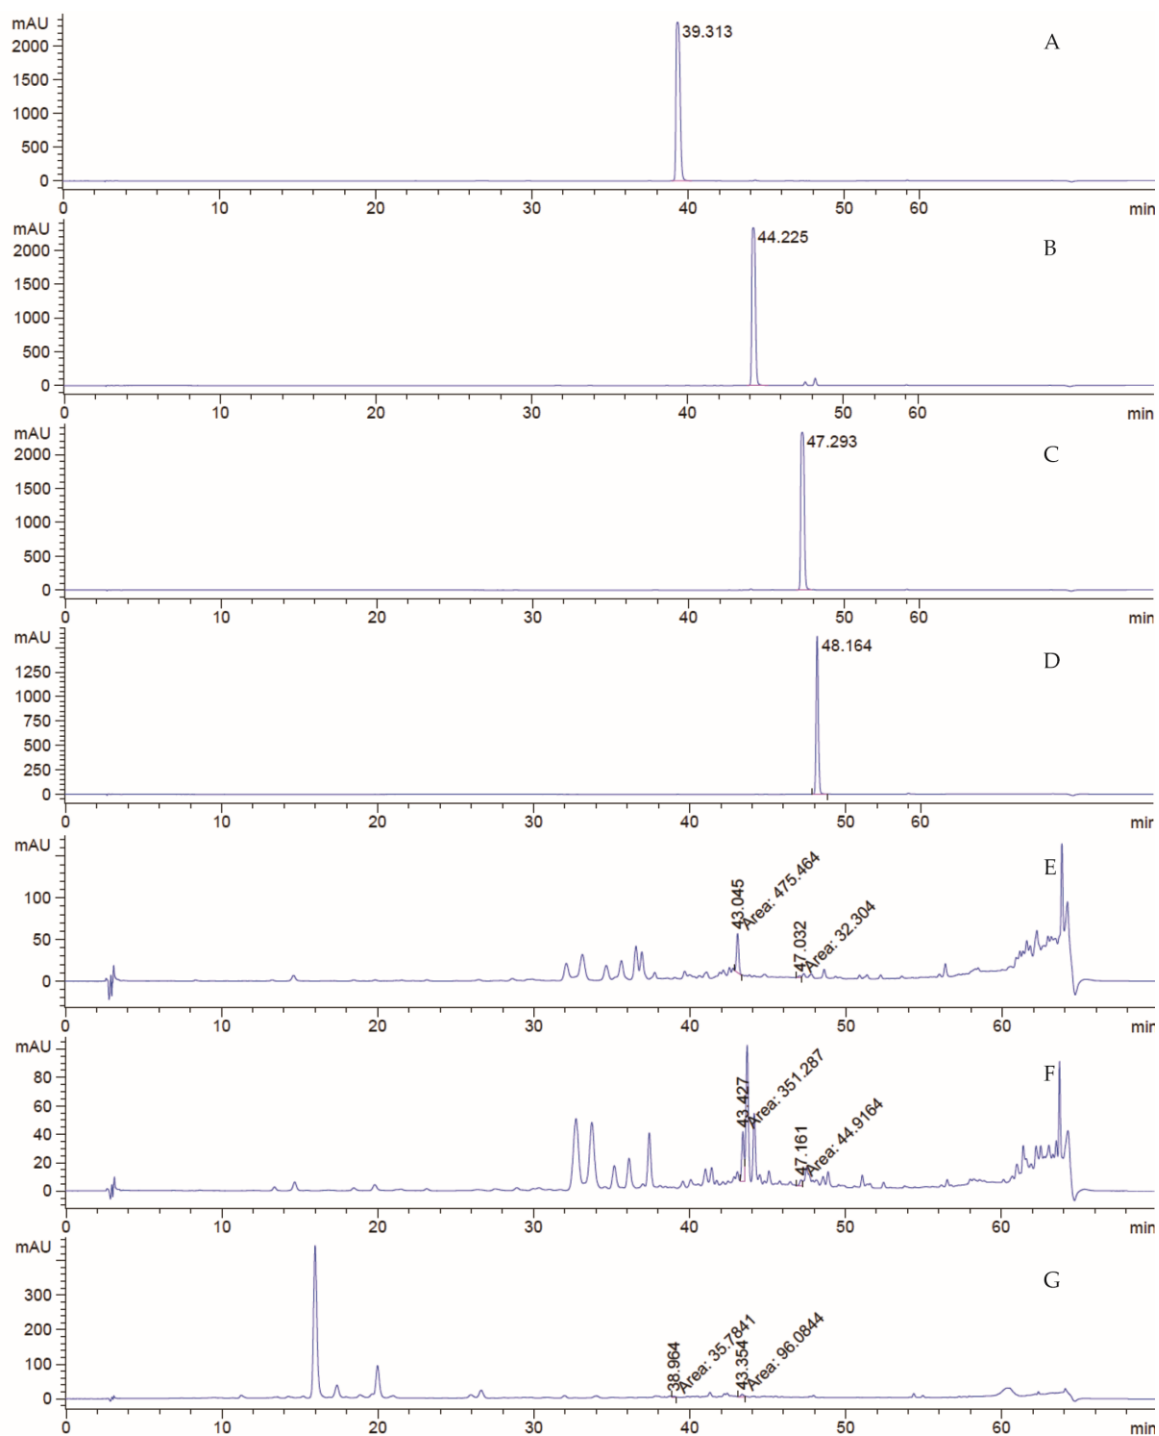

**Supplementary Figure S4 (Cont.):**

High-performance liquid chromatograms of standards including (A) myricetin, (B) quercetin, (C) kaempferol, and (D) isorhamnetin and samples including (E) *Psidium guajava* 'Kimju', (F) *Psidium guajava* 'Keenok', (G) *Ananas comosus* 'Pattavia', (H) *Ananas comosus* 'Phulae', (I) *Durio zibethinus* 'Chanee', (J) *Durio zibethinus* 'Monthong', (K) *Carica papaya* 'Khaekdum', and (L) *Mangifera indica* 'Namdokmai'. Retention times ( $R_t$ ) of phenolics in fruit extracts are indicated at a wavelength of 368 nm.

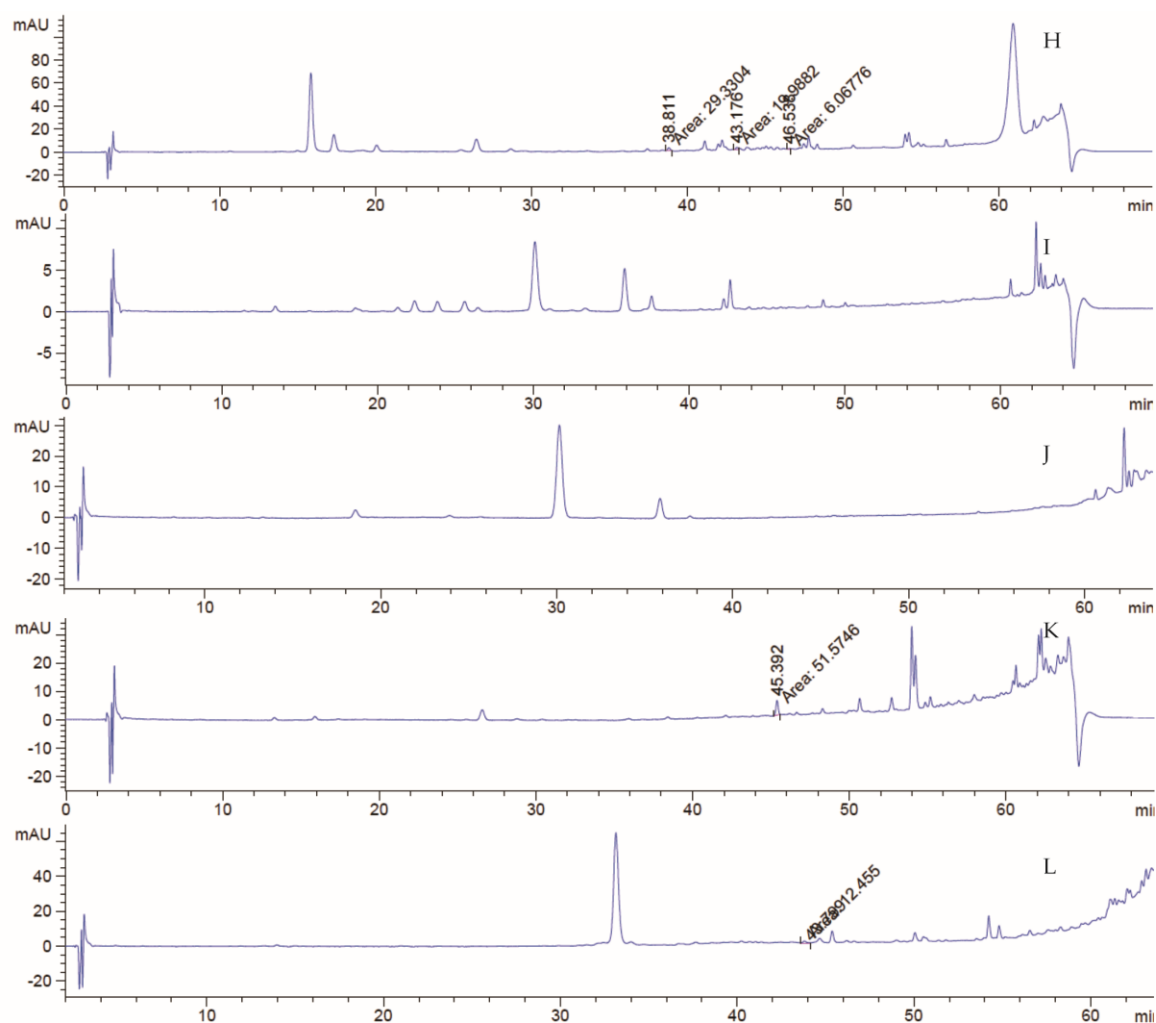

**Supplementary Figure S5:**

The cell morphology of Raji cells. (A) Negative control contained 0.1% (v/v) dimethyl sulfoxide (DMSO) and 1 mM sodium butyrate, and (B) positive control contained 0.1% (v/v) DMSO, 1 mM sodium butyrate, and 1 mM TPA. In this positive control, cells were clearly deformed into tree branch-like, dilation and flatness. Upper picture magnification: 20X and lower picture magnification: 40X;

**A.**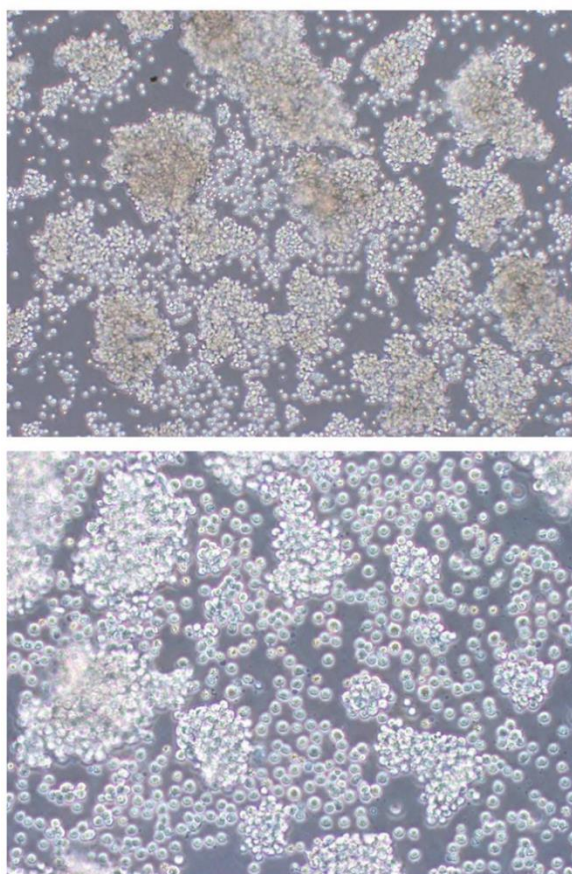**B.**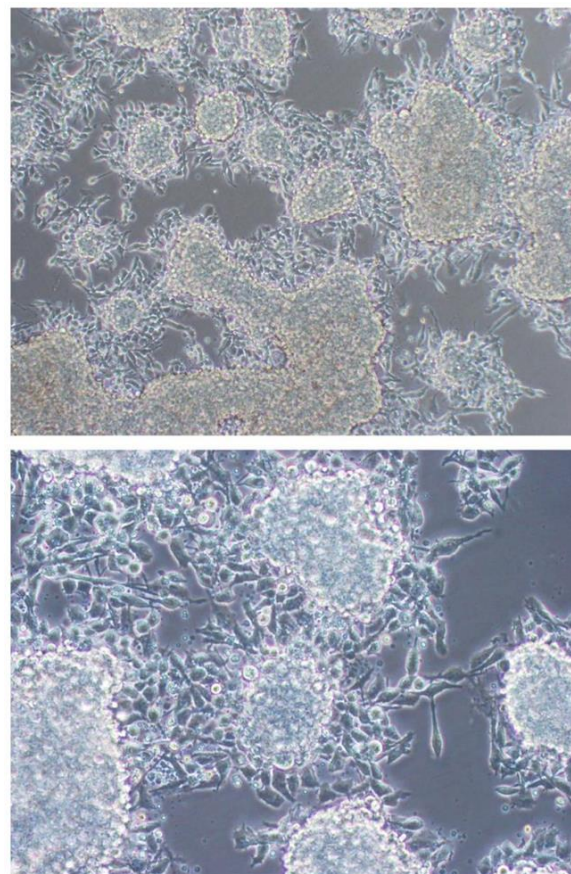



**Supplementary Figure S6:** The cell morphology of Raji cells after treatment with 0.1% (v/v) dimethyl sulfoxide (DMSO), 1 mM sodium butyrate, 1 mM and each fruit extracts from 1–200  $\mu\text{g/mL}$ . Upper picture magnification: 20X and lower picture magnification: 40X. (A) *Psidium guajava* ‘Kimju’, (B) *Psidium guajava* ‘Keenok’, (C) *Ananas comosus* ‘Pattavia’,

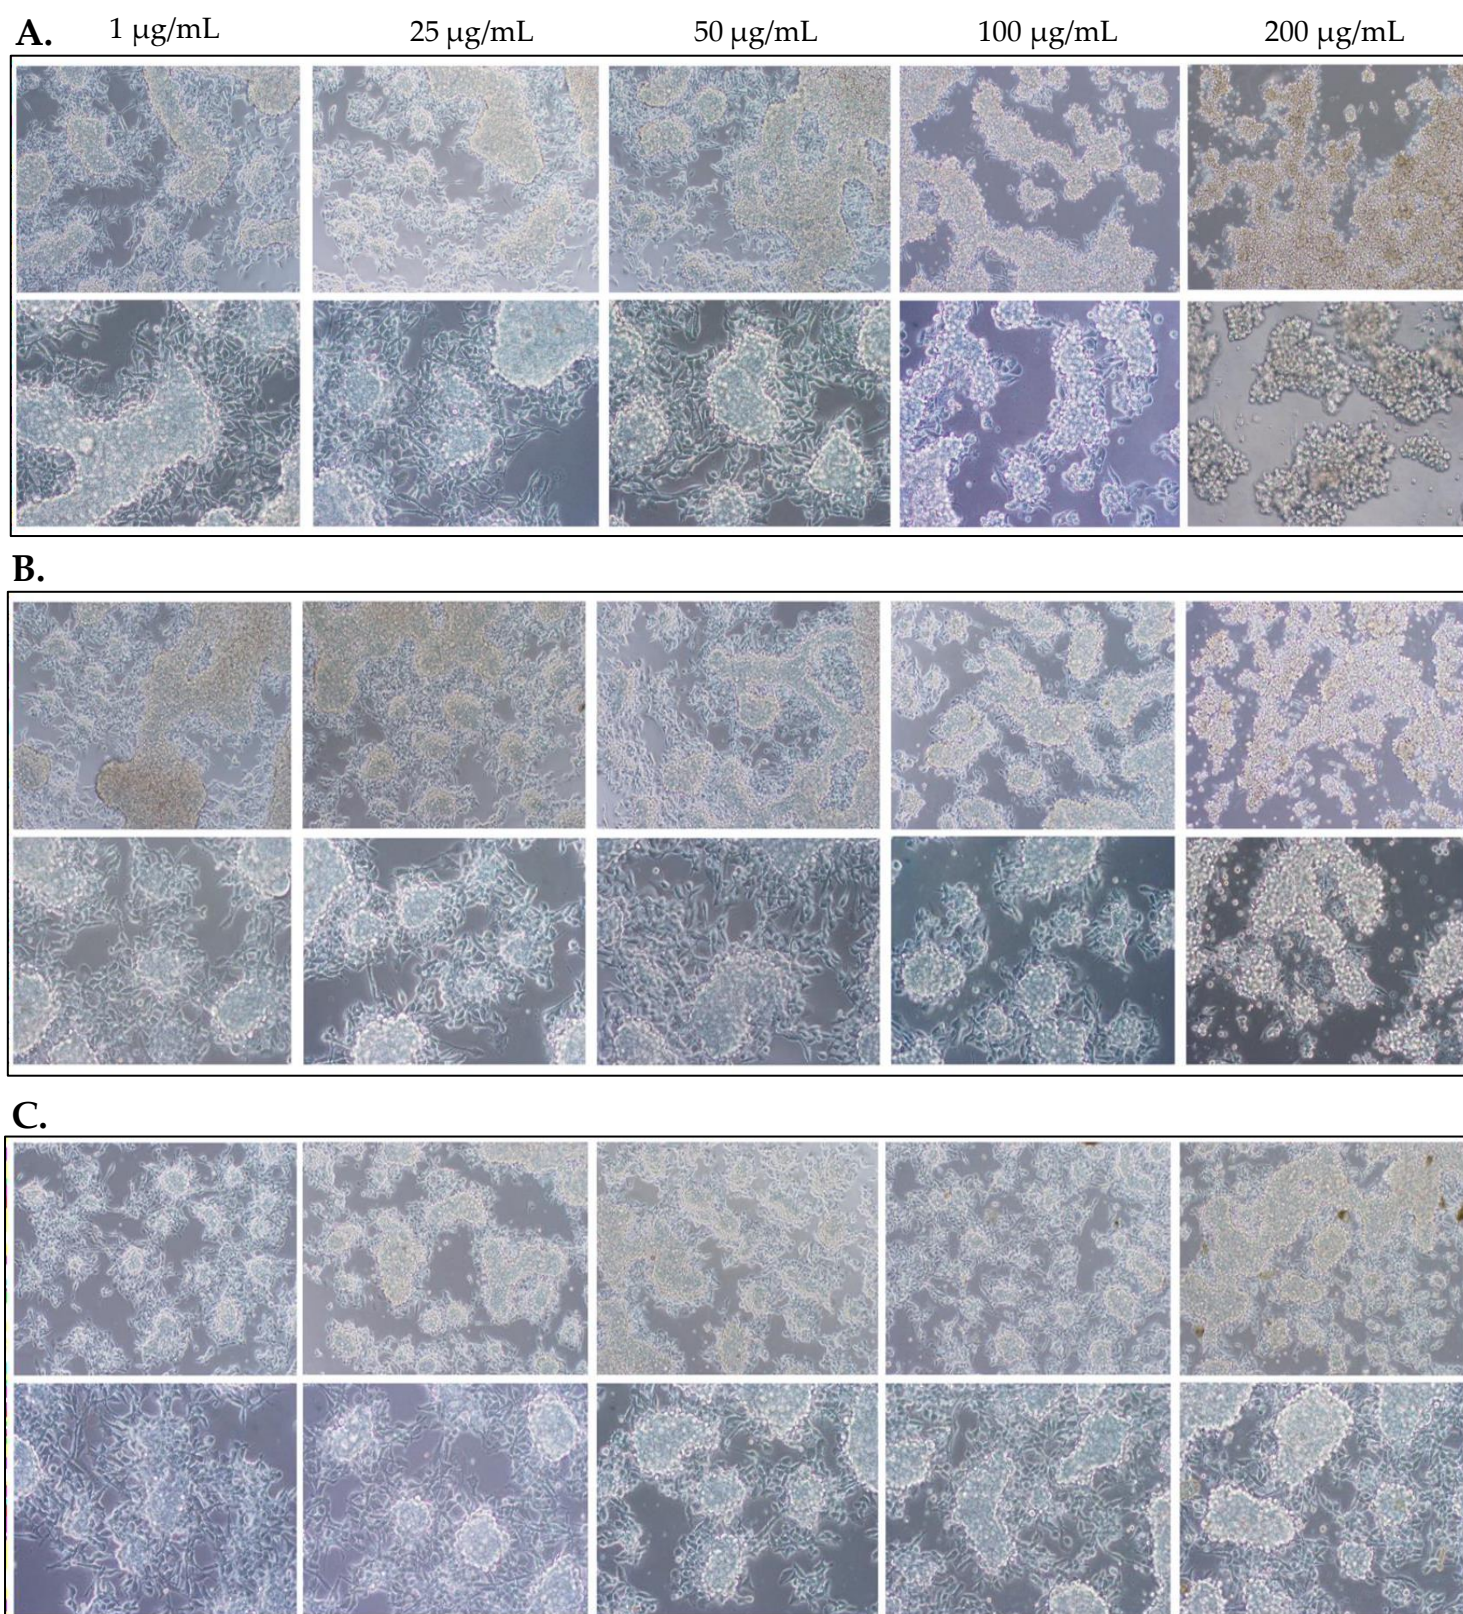



**Supplementary Figure S6 (Cont.):** The cell morphology of Raji cells after treatment with 0.1% DMSO, 1 mM sodium butyrate, 1 mM and each fruit extracts from 1–200  $\mu\text{g/mL}$ . Upper picture magnification: 20X and lower picture magnification: 40X. (D) *Durio zibethinus* ‘Chanee’, (E) *Durio zibethinus* ‘Monthong’, and (F) *Carica papaya* ‘Khaekdum’.

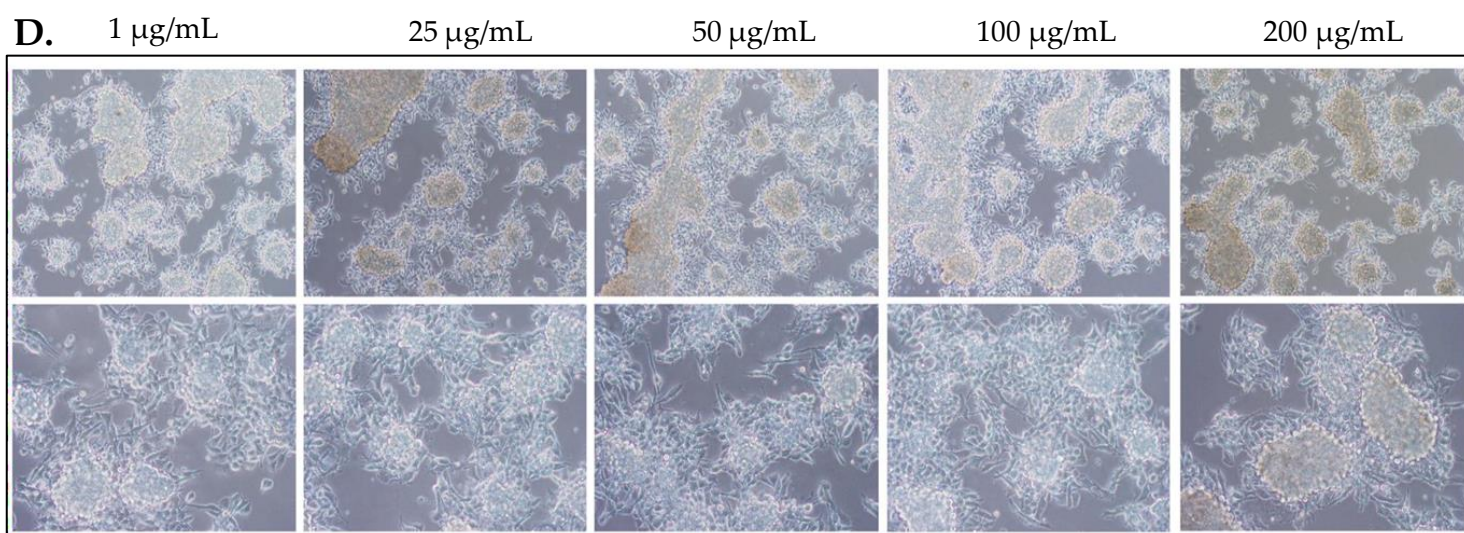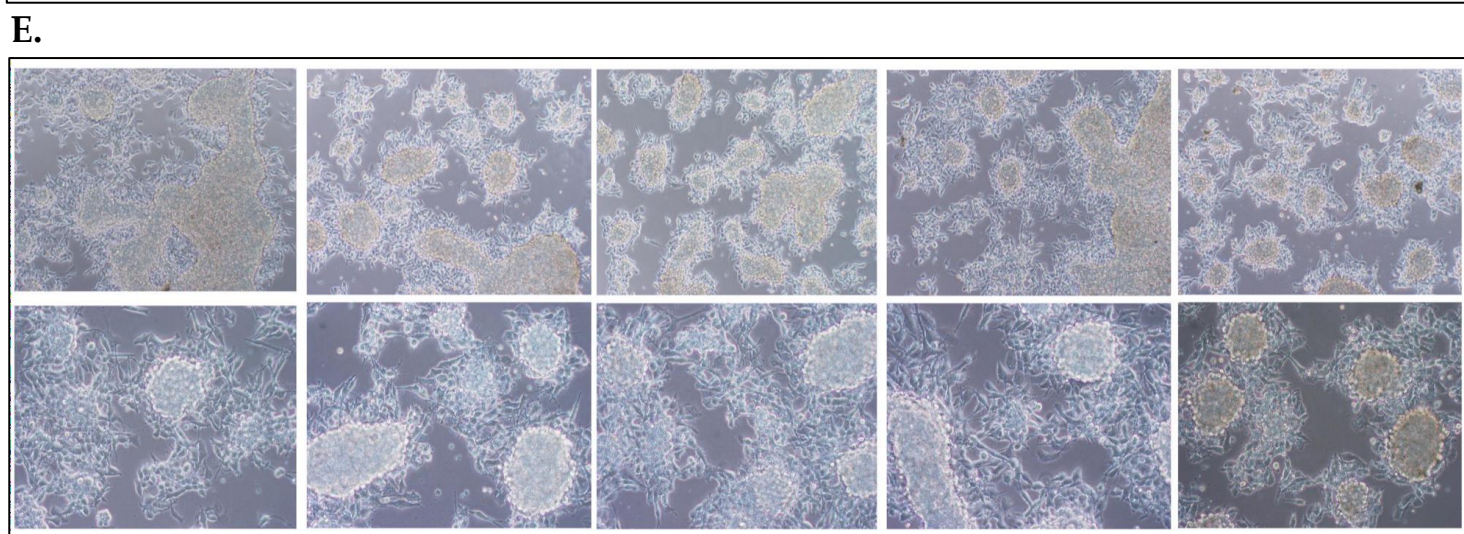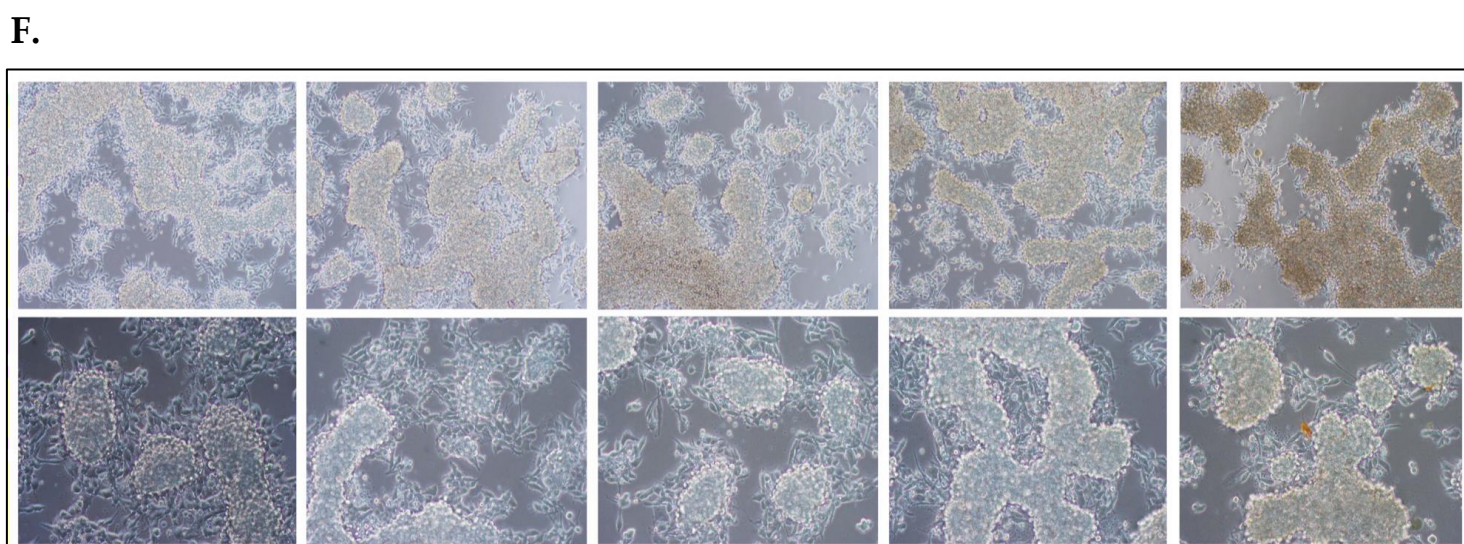

Supplement: s1 [file s1]
